# Supplementary material
Source: Springer Nature journal article supplement (https://www.springermedizin.de/resource/supplementary/12882_2014_871_MOESM4_ESM.pdf/9454498)

# Cumulative Long-term Rate

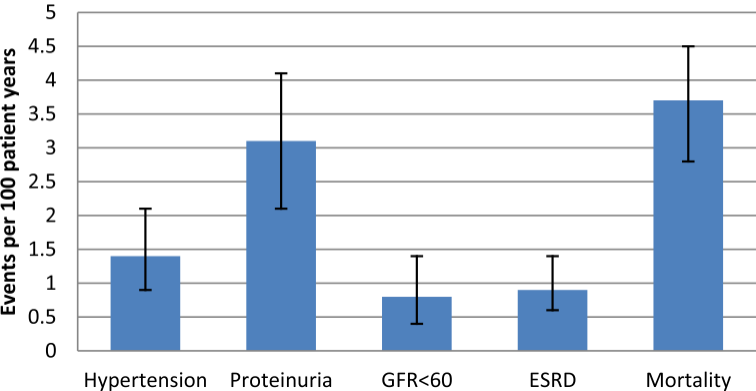

Supplement: MOESM4 [file 9454498]
